# Supplementary material for: Elevated Soluble Galectin-3 as a Marker of Chemotherapy Efficacy in Breast Cancer Patients: A Prospective Study
Source: Hindawi journal article supplement (doi:10.1155/2020/4824813), 2020-03-14
Supplement: f1 [file 4824813.f1.pdf]

**Supplemental Material:**

**Supplemental Fig. 1:**

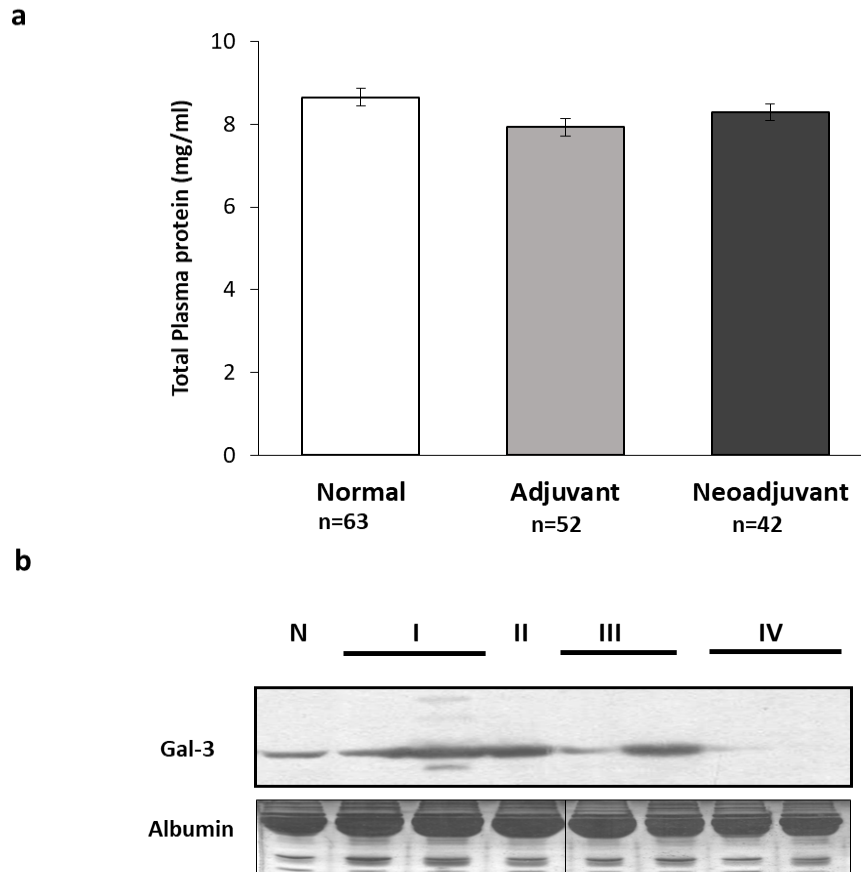

**Supplemental Fig. 1: Plasma levels of Galectin-3 decrease with increasing grade of tumor in breast cancer patients. a.** Total protein levels in plasma remain unchanged regardless of disease state in cancer patients prior to any treatment. **b.** A representative western blot showing relative Gal-3 expression in plasma from patients with varying grades of breast cancer and non-tumoral control. Albumin band on silver stained gel is used as a loading control.

**Supplemental Fig. 2**

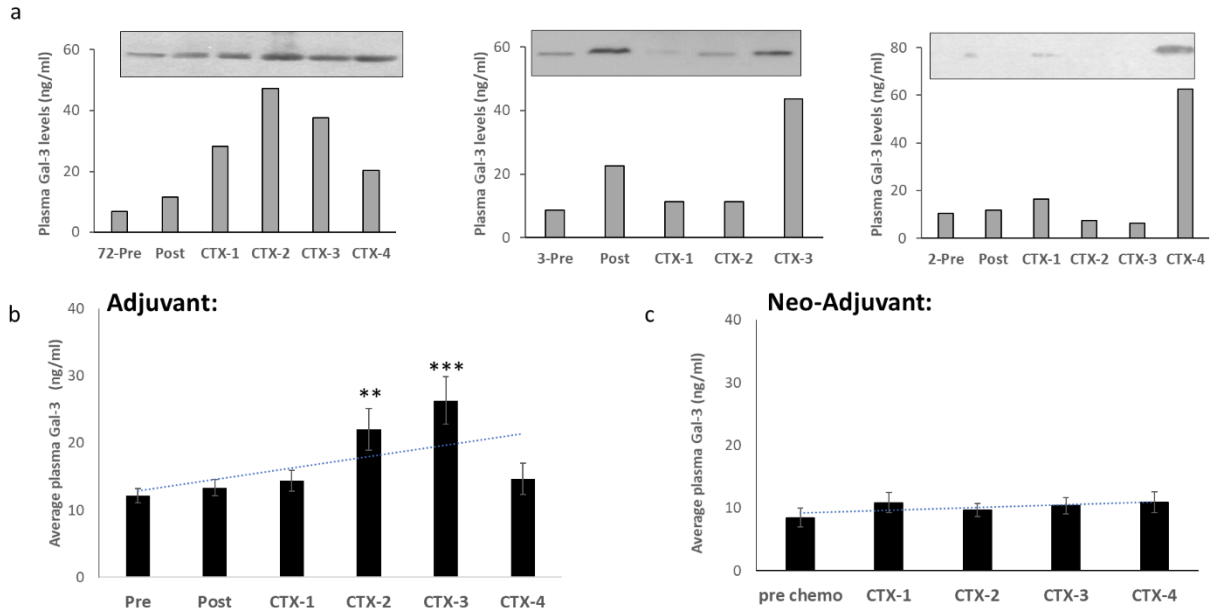

**Supplemental Fig. 2: Plasma Gal-3 levels increase in response to chemotherapy.** **a.** Representative ELISA quantification graphs and matched western blots confirming chemotherapy induced rise in plasma Gal-3 levels. Patient study number is listed at the beginning of each graph. Initial levels at the time of diagnosis (Pre), 2-weeks post surgical removal of tumor (Post) and after each chemotherapy cycle (CTX-1 to CTX-4) are shown. **b** Average plasma Gal-3 levels were calculated at the time of diagnosis (pre), 2 weeks post-surgical tumor removal (Post) and after each chemotherapy cycle (CTX-1-4) in patients receiving adjuvant chemotherapy (n=45). Notice significant increase in Gal-3 levels with each chemotherapy cycle in adjuvant patients (Pre:CTX2 p=0.008812; Pre:CTX3 p=0.000717 compared to initial (Pre) levels).

**Supplemental Fig. 3**

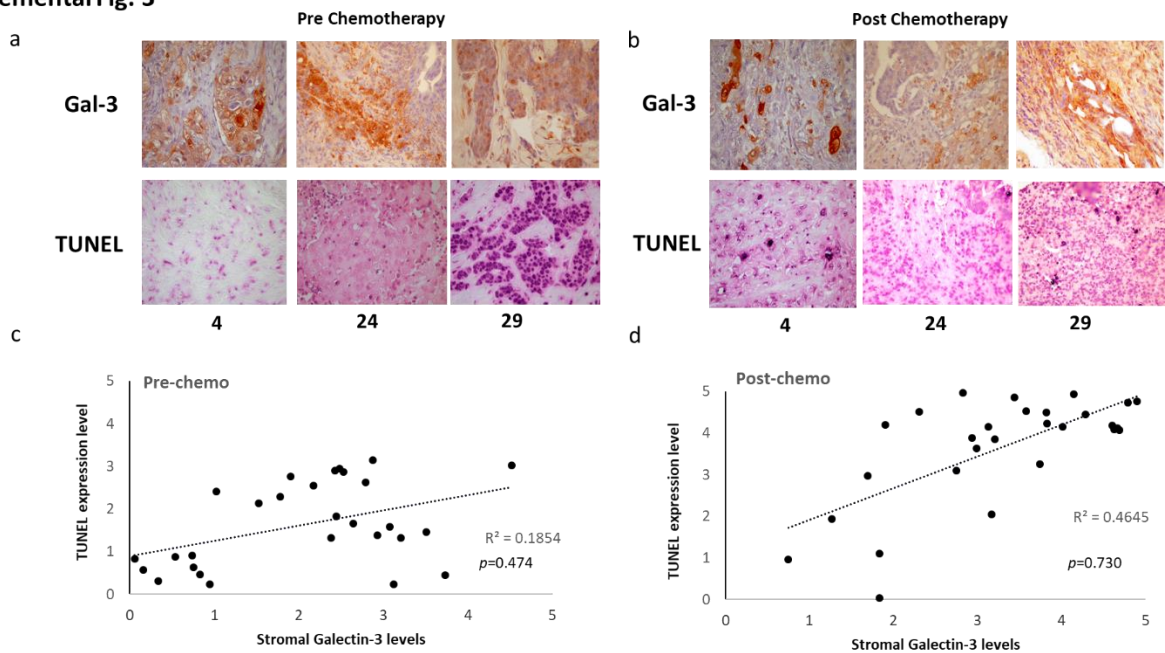

**Supplemental Fig. 3: Chemotherapy induced extracellular Gal-3 correlates with apoptosis in cancer cells.** **a.** TUNEL analysis of pre and post chemotherapy tumor tissue indicate positive relationship between stromal Gal-3 expression and apoptosis. Tissues with higher levels of stromal Gal-3 also show increase TUNEL reactivity. **b.** Correlation graph depicting the relationship between stromal Gal-3 expression and TUNEL reactivity. Pearson coefficient calculation was used to examine correlation. There was a strong positive correlation between stromal Gal-3 and TUNEL expressions post-chemotherapy ( $p=0.730$ ). These results suggest an anti-tumor effect of soluble Gal-3.

**Supplemental Table I: Patient characteristics for breast cancer patients receiving Adjuvant chemotherapy after surgical removal of primary tumor.** Patient age, tumor size, type, grade and metastatic status are given. TRN=Triple negative; ER= Estrogen receptor; PR= Progesterone receptor; IDC=Intra-ductal carcinoma; DCIS= Ductal carcinoma in-situ; LCA= Lobular carcinoma; AC-T=Doxorubicin hydrochloride (Adriamycin) & Cyclophosphamide followed by Taxol; FAC/T=Fluorouracil, Doxorubicin, Cyclophosphamide followed by Taxol; CMF=Cyclophosphamide, Methotrexate, Fluorouracil.

| ADJUVANT Patient Info |     |            |         |           |       |       |         |            |
|-----------------------|-----|------------|---------|-----------|-------|-------|---------|------------|
| ID                    | Age | Tumor type | Grade   | Ln status | ER    | PR    | Her2Neu | Chemo type |
| 1                     | 41  | IDC        | III     | +         | -     | -     | 2+      | AC/ T      |
| 2                     | 29  | IDC        | III     | +         | -     | -     | -       | AC/T       |
| 3                     | 39  | IDC        | III     | -         | -     | +     | -       | CMF/T      |
| 6                     | 34  | IDC        | II      | +         | -     | -     | 3+      | AC/ T      |
| 7                     | 43  | IDC        | II      | +         | +     | +     | -       | CMF/ T     |
| 8                     | 53  | IDC        | II/ III | +         | -     | -     | +       | FAC/T      |
| 9                     | 64  | IDC        | II      | +         | +     | +     | -       | FAC/ T     |
| 10                    | 43  | IDC        | II      | -         | +     | +     | 2+      | CMF/T      |
| 46                    | 63  | IDC        | II      | +         | +     | -     | -       | FAC/T      |
| 47                    | 29  | IDC        | II      | +         | -     | -     | -       | AC/T       |
| 48                    | 37  | IDC        | III     | +         | -     | +     | -       | AC/T       |
| 49                    | 43  | IDC        | II      | +         | -     | -     | -       | FAC/T      |
| 50                    | 59  | IDC        | III     | N/A       | +     | +     | +       | AC/T       |
| 51                    | 54  | IDC        | III     | +         | -     | -     | -       | AC/T       |
| 52                    | 32  | IDC        | II      | +         | +     | +     | 2+      | AC/T       |
| 53                    | 36  | IDC        | II      | +         | -     | -     | +       | AC/T       |
| 54                    | 44  | IDC        | III     | -         | +     | +     | -       | FAC        |
| 55                    | 44  | IDC        | II      | +         | +     | +     | 2+      | AC/T       |
| 56                    | 28  | IDC        | III     | +         | -     | -     | -       | AC/T       |
| 57                    | 38  | IDC        | III     | +         | -     | -     | -       | FAC        |
| 58                    | 59  | IDC        | III     | -         | N/A   | N/A   | N/A     | AC/T       |
| 59                    | 51  | IDC        | III     | +         | +     | -     | 2+      | FAC/T      |
| 60                    | 54  | IDC        | III     | +         | +     | -     | -       | FAC        |
| 68                    | 39  | IDC        | III     | +         | +     | -     | 3+      | AC/T       |
| 71                    | 37  | IDC        | II      | +         | 75% + | 90% + |         | Taxol      |
| 72                    | 49  | IDC        | II      | +         | +     | +     | -       | AC/T       |
| 73                    | 40  | IDC        | III     | +         | -     | -     | -       | AC/T       |
| 74                    | 44  | IDC        | III     | +         | +     | -     | -       | FAC/T      |
| 75                    | 42  | IDC        | II      | +         | -     | +     | 1+      | AC/T       |
| 76                    | 39  | Sarcoma    | III     | +         | N/A   | N/A   | N/A     | AC/T       |
| 77                    | 34  | IDC        | III     | -         | -     | -     | -       | AC/T       |
| 78                    | 56  | ILC        | II      | -         | N/A   | N/A   | N/A     | AC/T       |
| 79                    | 54  | IDC        | III     | -         | N/A   | N/A   | N/A     | AC/T       |
| 80                    | 51  | IDC        | III     | -         | N/A   | N/A   | N/A     | AC/T       |
| 81                    | 57  | IDC        | III     | -         | -     | -     | -       | AC/T       |
| 82                    | 46  | IDC        | II      | +         | +     | +     | -       | AC/T       |
| 83                    | 56  | ILC        | II      | +         | N/A   | N/A   | N/A     | AC/T       |
| 84                    | 59  | IDC        | II      | -         | +     | +     | -       | AC/T       |

|            |    |          |     |     |          |          |     |       |
|------------|----|----------|-----|-----|----------|----------|-----|-------|
| <b>85</b>  | 64 | IDC      | II  | +   | N/A      | N/A      | N/A | FAC/T |
| <b>86</b>  | 59 | IDC      | III | +   | +        | -        | 3+  | FAC/T |
| <b>87</b>  | 34 | IDC      | III | -   | +        | +        | 2+  | AC/T  |
| <b>88</b>  | 39 | IDC      | III | -   | +        | +        | -   | FAC   |
| <b>89</b>  | 47 | ILC      | IV  | +   | -        | 30% +    | -   | AC/T  |
| <b>90</b>  | 45 | IDC      | III | +   | <10%     | <10%     | -   | AC/T  |
| <b>91</b>  | 46 | IDC      | II  | N/A | N/A      | N/A      | N/A | AC.T  |
| <b>101</b> | 55 | IDC      | II  | -   | -        | -        | 3+  | AC/T  |
| <b>102</b> | 44 | IDC      | III | +   | <10%     | <10%     | -   | AC/T  |
| <b>103</b> | 33 | IDC      | III | +   | -        | -        | 2+  | AC/T  |
| <b>104</b> | 47 | IDC      | II  | +   | 20-40% + | 10-15% + | -   | AC/T  |
| <b>105</b> | 65 | IDC/ ILC | II  | +   | 80% +    | 50% +    | -   | AC/T  |
| <b>106</b> | 55 | IDC      | II  | -   | 10% +    | -        | 2+  | FAC/T |
| <b>107</b> | 56 | IDC      | II  | +   | 10%+     | 10%+     | 2+  | AC/T  |

TRN=Triple negative; ER= Estrogen receptor; PR= Progesterone receptor; IDC=Intra-ductal carcinoma; DCIS= Ductal carcinoma in-situ; LCA= Lobular carcinoma; AC-T=Doxorubicin hydrochloride (Adriamycin) & Cyclophosphamide followed by Taxol; FAC/T=Fluorouracil, Doxorubicin, Cyclophosphamide followed by Taxol; CMF=Cyclophosphamide, Methotrexate, Fluorouracil.

**Supplemental Table II: Patient characteristics for breast cancer patients receiving Neo-adjuvant chemotherapy followed by surgery.** Patient age, tumor size, type, grade and metastatic status are given. TRN=Triple negative; ER= Estrogen receptor; PR= Progesterone receptor; IDC=Intra-ductal carcinoma; DCIS= Ductal carcinoma in-situ; LCA= Lobular carcinoma. AC-T=Doxorubicin hydrochloride (Adriamycin) & Cyclophosphamide followed by Taxol; FAC/T=Fluorouracil, Doxorubicin, Cyclophosphamide followed by Taxol; CMF=Cyclophosphamide, Methotrexate, Fluorouracil.

| Neo-adjuvant Patient Info |     |               |       |           |       |       |         |                   |
|---------------------------|-----|---------------|-------|-----------|-------|-------|---------|-------------------|
| ID                        | Age | Tumor type    | Grade | Ln status | ER    | PR    | Her2Neu | Chemo type        |
| 4                         | 58  | IDC           | III   | -         | -     | -     | -       | FAC/T             |
| 5                         | 35  | IDC           | III   | -         | +     | +     | -       | FAC/T             |
| 21                        | 26  | IDC           | N/A   | -         | -     | -     | 2+      | AC/T              |
| 22                        | 48  | Metastatic Ca | N/A   | +         | -     | -     | -       | AC/T              |
| 23                        | 49  | IDC           | III   | +         | -     | -     | 3+      | AC/T              |
| 24                        | 41  | IDC           | III   | +         | -     | -     | 3+      | FAC/T             |
| 25                        | 39  | IDC           | III   | +         | 30%   | 20%   | 3+      | FAC/T             |
| 26                        | 39  | ILC           | II    | +         | -     | -     | 3+      | FAC/T             |
| 27                        | 52  | IDC           | III   | +         | -     | -     | -       | AC/T              |
| 28                        | 40  | IDC           | III   | +         | -     | -     | -       | AC/T              |
| 29                        | 48  | IDC           | II    | -         | 60-70 | 70-80 | -       | AC/T              |
| 30                        | 39  | IDC           | III   | -         | +     | +     | -       | AC/T              |
| 67                        | 59  | IDC           | II    | +         | 80    | 90    | -       | AC/T              |
| 69                        | 47  | IDC           | I     | -         | 35-40 | -     | -       | Carboplatin/ T    |
| 70                        | 62  | IDC           | II    | +         | 50 %  | 10%   | -       | AC/T              |
| 94                        | 44  | IDC           | II    | -         | -     | -     | 3+      | FAC/T             |
| 98                        | 54  | ILC           | II    | +         | +     | +     | -       | FAC/ T            |
| 99                        | 44  | IDC           | III   | +         | -     | -     | -       | AC/T              |
| 92                        | 41  | LCIS          | III   | -         | +     | -     | -       | AC/T              |
| 93                        | 47  | IDC/ ILC      | II    | -         | 5%    | 5%    | -       | AC/T              |
| 95                        | 43  | IDC/ ILC      | II    | -         | 5%    | 5%    | -       | AC/T              |
| 96                        | 48  | IDC           | III   | +         | -     | -     | -       | AC/T              |
| 97                        | 52  | IDC           | III   | -         | -     | -     | -       | AC/T              |
| 100                       | 20  | IDC           | III   | +         | -     | -     | 2+      | FAC/ T            |
| 108                       | 54  | IDC           | IV    | N/A       | N/A   | N/A   | N/A     | FAC/ 5FU/ T       |
| 109                       | 39  | IDC           | II    | -         | 60%   | 30%   | N/A     | AC/ T             |
| 110                       | 42  | IDC           | III   | +         | 50%   | -     | -       | AC/ T/ Doc        |
| 111                       | 55  | IDC           | III   | +         | N/A   | N/A   | N/A     | FAC/T             |
| 112                       | 50  | IDC           | III   | +         | -     | -     | -       | AC/ T             |
| 113                       | 39  | IDC           | II    | -         | -     | -     | +       | AC/ T             |
| 114                       | 30  | IDC           | III   | +         | -     | -     | -       | Carboplatin/ AC/T |
| 115                       | 45  | IDC           | II    | N/A       | -     | -     | 3+      | FAC/T             |
| 116                       | 34  | IDC           | II    | N/A       | -     | -     | -       | AC/T              |
| 117                       | 63  | IDC           | III   | N/A       | N/A   | N/A   | N/A     |                   |
| 118                       | 49  | IDC           | II    | -         | -     | -     | -       | AC/ T             |
| 119                       | 45  | IDC           | III   | +         | -     | -     | 3+      | AC/T              |

TRN=Triple negative; ER= Estrogen receptor; PR= Progesterone receptor; IDC=Intra-ductal carcinoma; DCIS= Ductal carcinoma in-situ; LCA= Lobular carcinoma; AC-T=Doxorubicin hydrochloride (Adriamycin) & Cyclophosphamide followed by Taxol; FAC/T=Fluorouracil, Doxorubicin, Cyclophosphamide followed by Taxol; CMF=Cyclophosphamide, Methotrexate, Fluorouracil.
